# Supplementary material
Source: PubMed Central journal article supplement (PMC7385919)
Supplement: NIHMS1575945-supplement-Supplementary_Figure_1.pdf [file NIHMS1575945-supplement-Supplementary_Figure_1.pdf]

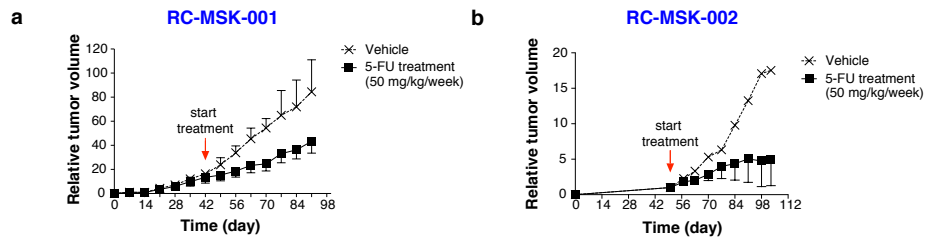

**Supplementary Figure 1 | Tumorigenicity in ectopic models and responses to 5-FU therapy *in vivo*.** **a**, Growth of tumors established from flank injection of RC-MSK-001 tumoroid. The graph displays relative tumor volume over time in the vehicle (n = 4) and

5-FU (n = 6) treated groups. Error bars = SD. **b**, RC-MSK-002 tumoroid flank model (similar as in **a**) for vehicle (n = 2) and 5-FU (n = 3) treated groups. Error bars = SD where shown (if not shown then they were not calculated due to small sample size).
